# Supplementary material for: African Swine Fever Virus EP364R and C129R Target Cyclic GMP-AMP To Inhibit the cGAS-STING Signaling Pathway
Source: PubMed Central journal article supplement (PMC9364804; doi:10.1128/jvi.01022-22), 2022-07-21
Supplement: jvi.01022-22-s0001.pdf [file jvi.01022-22-s0001.pdf]

1

**TABLE S1: List of primers used for real time PCR**

| <b>Target gene</b> | <b>Forward primer</b> | <b>Reverse primer</b> |
|--------------------|-----------------------|-----------------------|
| pIFN- $\beta$      | AAATCGCTCTCTGATGTGT   | TGCTCCTTTGTTGGTATCG   |
| pIFN- $\gamma$     | CCATTCAAAGGAGCATGGAT  | ATCCATGCTCCTTTGAATGG  |
| pIL-6              | CACCGGTCTTGTGGAGTTTC  | GTGGTGGCTTTGTCTGGATT  |
| pIL-1 $\beta$      | GGGACTTGAAGAGAGAAGTGG | CTTCCCTTGATCCCTAAGGT  |
| pTNF $\alpha$      | TCACAGGGCAATGATCCC    | GGGATCATTGCCCTGTGA    |
| pMCP-1             | CAGAAGAGTCACCAGCAGCA  | TCCAGGTGGCTTATGGAGTC  |
| pMX-1              | TAGGCAATCAGCCATACG    | GTTGATGGTCTCCTGCTTAC  |
| pISG-15            | AAATCGCTCTCCTGATGTGT  | TGCTCCTTTGTTGGTATCG   |

2

3

4

5

6

7

8

9

10

11

12

13

14

15 **Supplementary figures**

16

**FIG S1**

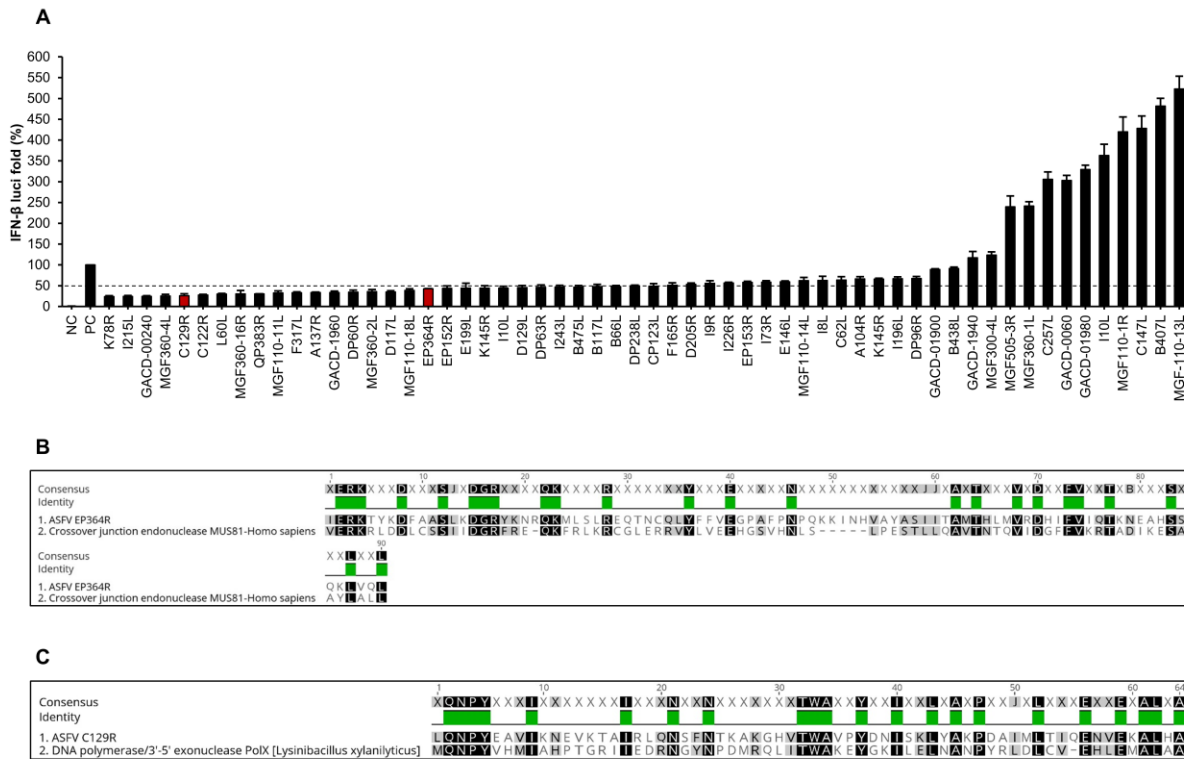

17

18 **FIG S1 Screening results of ASFV genes library**

19 (A) 293-Dual™ hSTING-A162 cells were transfected with indicated individual ASFV gene for 24  
 20 h. Then 4 μg of 2'3'cGAMP ligand was transfected into the cells and IFN-β luciferase activity was  
 21 measured at 12 h post treatment. (B) Sequence alignment of ASFV EP364R with crossover  
 22 junction endonuclease MUS81 (*Homo sapiens*) and (C) sequence alignment of ASFV C129R with  
 23 DNA polymerase/ 3'-5' exonuclease PolX (*Lysinibacillus xylanilyticus*).

24

25

FIG S2

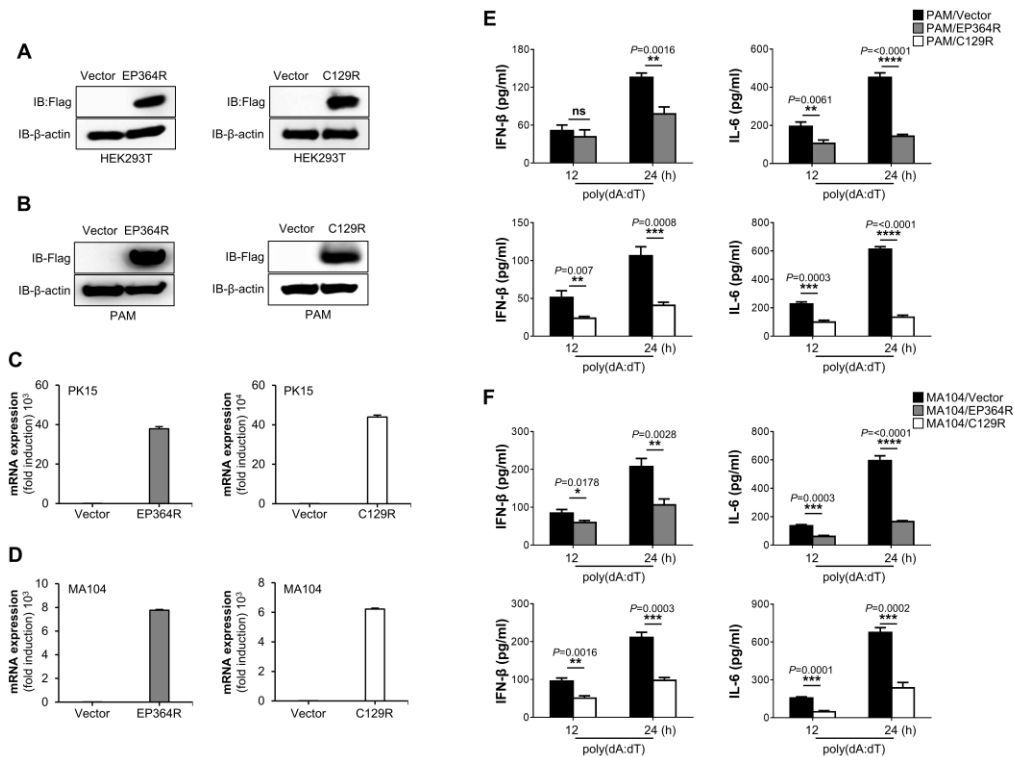

26

27 **FIG S2 Overexpression of EP364R and C129R suppresses the IFN and cytokine production**

28 Protein expression of overexpressed EP364R and C129R in HEK293T (A) and PAM cells (B).

29 Gene transcription level of EP364R and C129R in PK-15 (C), and MA104 cells (D) Cells were

30 transfected with an IRES vector or Flag-EP364R or Flag-C129R and cDNA was synthesized,

31 followed by qRT-PCR. PAM cells (E) and MA104 cells (F) were transfected with Flag-EP364R

32 and Flag-C129R plasmids and treated with poly(dA:dT) at 24 hpt. At the indicated time points,

33 cell supernatants were collected and IFN-β and IL-6 secretions were measured. All the data are

34 representative of at least two independent experiments, each with similar results, and the values

35 are expressed as mean  $\pm$  SD of three biological replicates. All the immunoblot data are

36 representative of at least two independent experiments, each with similar results. Student's t-test;

37 \*  $p < 0.05$ ; \*\*  $p < 0.01$ ; \*\*\*  $p < 0.001$ ; ns, not significant.

38

39

40

41

42

43

44

45

46

47

48

49

50

51

FIG S3

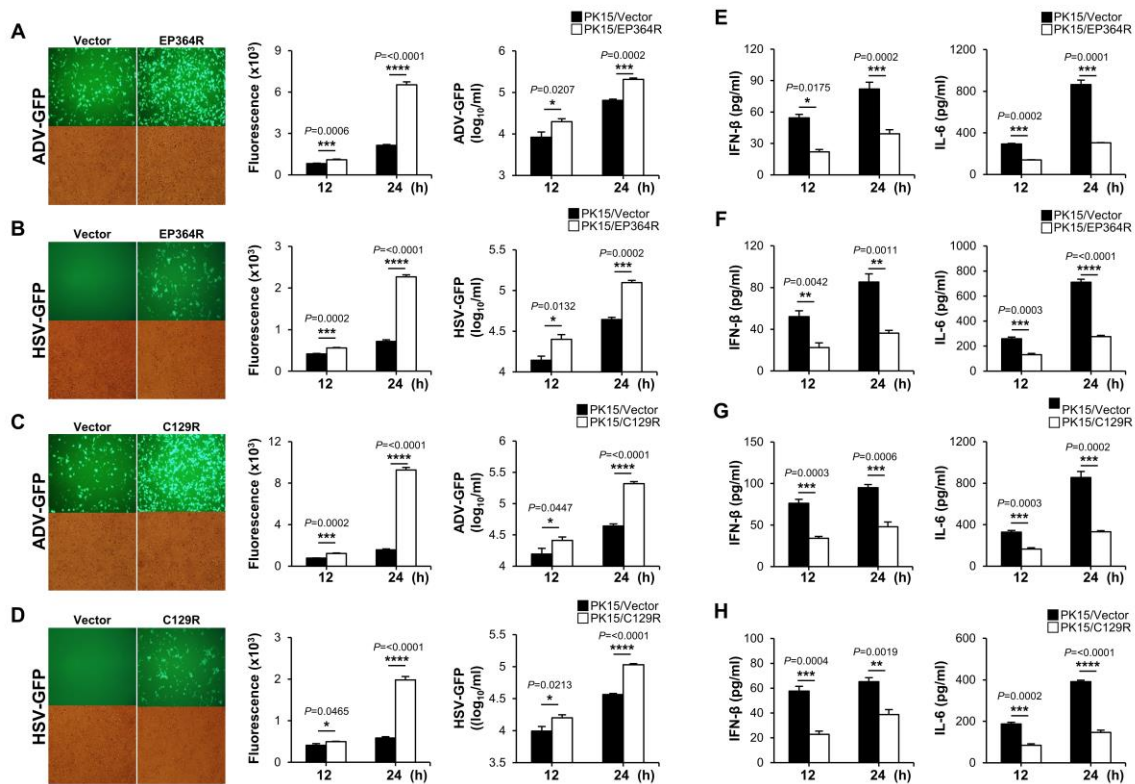

52

53 **FIG S3 EP364R and C129R negatively regulate antiviral immune responses in PK-15 cells**

54 PK-15 cells were transiently transfected with Flag-EP364R (A and B) or Flag-C129R (C and D)

55 plasmids along with the control vector followed by the ADV-GFP (1MOI) (A and C) and HSV-

56 GFP (1MOI) (B and D) infection at 24 hpt. Viral replication was visualized at 24 hpi by GFP

57 expression levels using fluorescence microscopy and quantified at 12 hpi and 24 hpi by a

58 fluorescence modulator. Virus titers of each sample were determined by plaque assay in A549

59 cells. Porcine IFN- $\beta$  and IL-6 secretion in cell culture supernatant at 12 hpi and 24 hpi were

60 determined by ELISA (E-H). Data are representative of at least two independent experiments, each

61 with similar results, and the values are expressed as mean  $\pm$  SD of three biological replicates.

62 Student's t-test; \*  $p < 0.05$ ; \*\*  $p < 0.01$ ; \*\*\*  $p < 0.001$ .

FIG S4

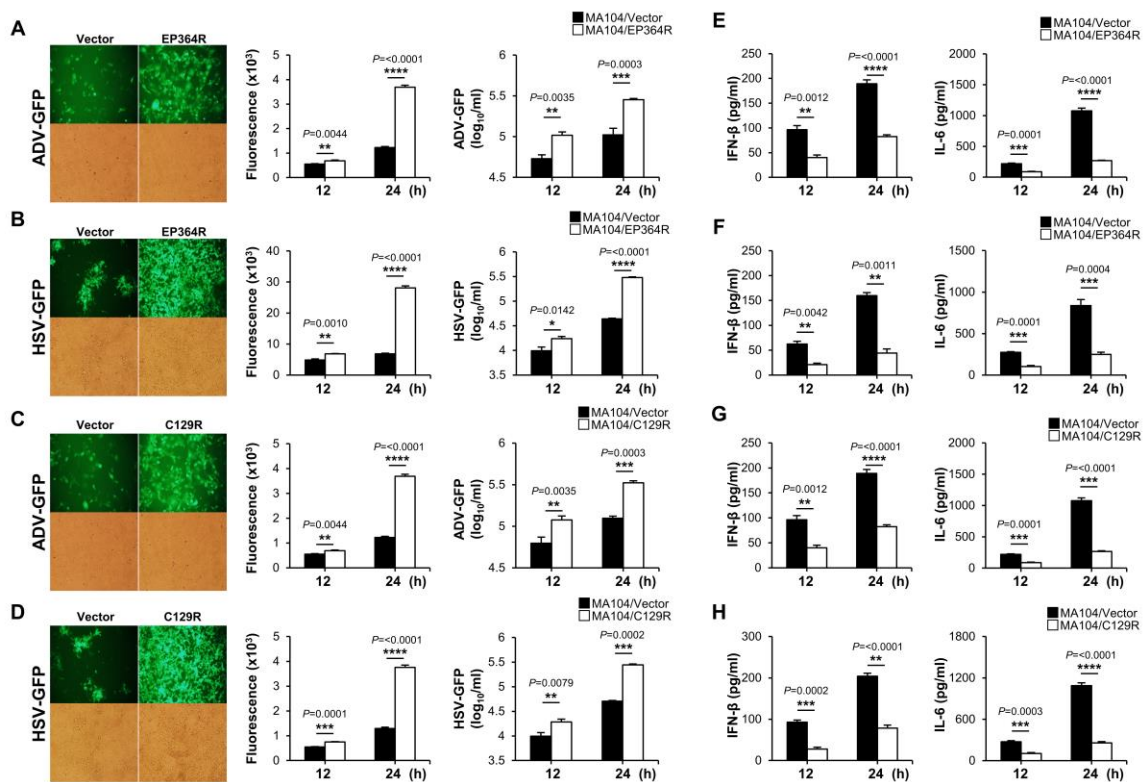

63

64 **FIG S4 EP364R and C129R negatively regulate antiviral immune responses in MA104 cells**

65 MA104 cells were transiently transfected with Flag-EP364R (A and B) or Flag-C129R (C and D)

66 plasmids along with the control vector followed by the ADV-GFP (1MOI) (A and C) and HSV-

67 GFP (1MOI) (B and D) infection at 24 hpt. Viral replication was determined at 24 hpi by GFP

68 expression levels using fluorescence microscopy and quantified at 12 hpi and 24 hpi by

69 fluorescence modulator. Virus titers of each sample were determined by plaque assay in Vero cells.

70 Human IFN-β and IL-6 secretion in cell culture supernatant at 12 hpi and 24 hpi were determined

71 by ELISA (E-H). Data are representative of at least two independent experiments, each with

72 similar results, and the values are expressed as mean ± SD of three biological replicates. Student's

73 t-test; \* p < 0.05; \*\* p < 0.01; \*\*\* p < 0.001.

FIG S5

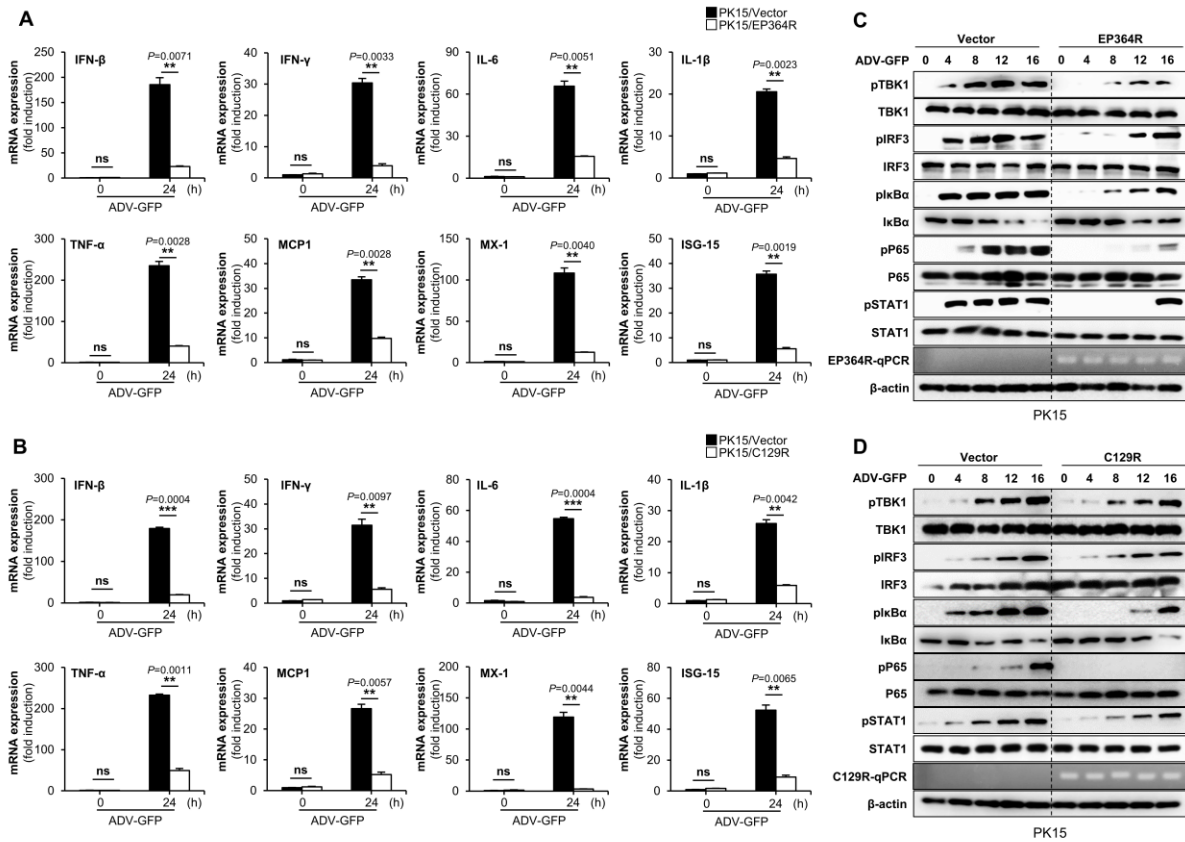

74

75 **FIG S5 EP364R and C129R suppress cGAS-STING pathway and antiviral gene**  
 76 **transcription in PK-15 cells**

77 (A and B) PK-15 cells were transfected with Flag-EP364R or Flag-C129R plasmids and control  
 78 vector plasmid. Cells were infected with ADV-GFP (1MOI) at 24 hpt, and cells were harvested at  
 79 indicated time points. Then total RNA was extracted and analyzed the transcription of the indicated  
 80 genes mRNA by quantitative real-time PCR. Data are representative of at least two independent  
 81 experiments. (C and D) Flag-EP364R or Flag-C129R and control plasmids were transfected into  
 82 PK-15 cells. Next, cells were infected with ADV-GFP (2MOI) and harvested at indicated time  
 83 points. EP364R or C129R gene expression level, total and phosphorylated TBK1, IRF3, I $\kappa$ B $\alpha$ , p65,  
 84 and STAT1 were measured by immunoblotting.  $\beta$ -actin was used as a loading control indicator.

85 All the data are representative of at least two independent experiments, each with similar results,  
86 and the values are expressed as mean  $\pm$  SD of two biological replicates. All the immunoblot data  
87 are representative of at least two independent experiments, each with similar results. Student's t-  
88 test; \*  $p < 0.05$ ; \*\*  $p < 0.01$ ; \*\*\*  $p < 0.001$ ; ns, not significant.

89

90

91

92

93

94

95



FIG S6

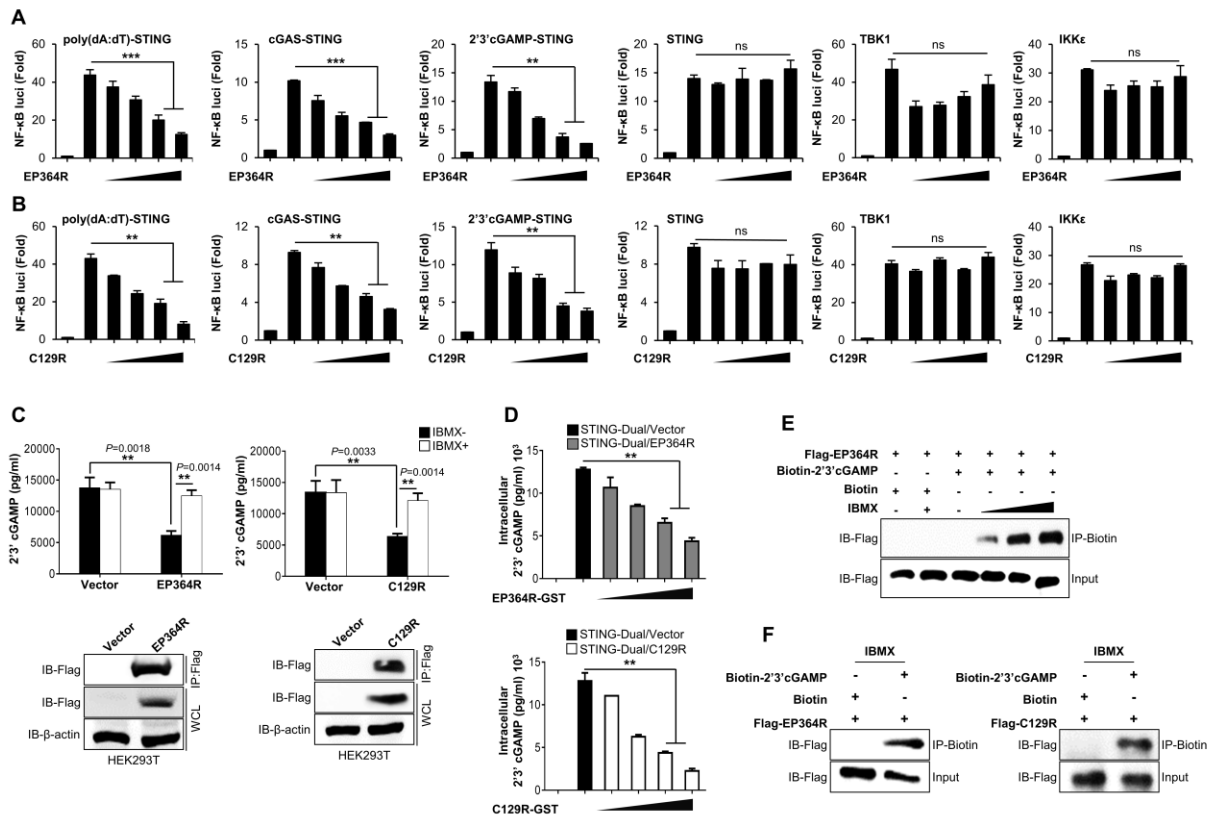

96

97 **FIG S6 EP364R and C129R bind to 2'3'cGAMP and induce its degradation**

98 (A and B) HEK293T cells were co-transfected with an increasing dose of Flag-EP364R or Flag-  
 99 C129R together with firefly luciferase reporter plasmid encoding the NF-κB promoter plus TK  
 100 renilla plasmid and cGAS, STING, TBK1, and IKKε or stimulated with poly(dA:dT) or  
 101 2'3'cGAMP for 24 h and 12 h respectively. TK-Renilla was used as transfection control to  
 102 normalize firefly luciferase activity. STING overexpressed 293-Dual™ hSTING-A162 cells were  
 103 used for poly(dA:dT), cGAS, and cGAMP induced luciferase assays. Results are expressed relative  
 104 to those of Renilla luciferase alone (internal control). (C) *In vitro* 2'3'cGAMP degradation assay.  
 105 Flag-EP364R or Flag-C129R proteins plus 2.5 μM 2'3'cGAMP with 1 mM IBMX were incubated  
 106 for 22 h at 37°C in reaction buffer followed by 2'3'cGAMP ELISA.. (D) 293-Dual™ hSTING-

107 A162 cells were co-transfected with indicated plasmids with cGAS plasmid Cells were harvested  
108 at 24 hpt and intracellular 2'3'cGAMP level were measured. . (E) IBMX inhibitor dose selection  
109 assay. Purified Flag-EP364R protein 2  $\mu\text{g}$  was incubated with 10  $\mu\text{M}$  biotin 2'3'cGAMP or 10  $\mu\text{M}$   
110 biotin with reaction buffer for 2 h at 30<sup>0</sup>C with 0.25 mM, 0.5 mM, 1 mM, and 2 mM IBMX and  
111 subjected to biotin pulldown by streptavidin magnetic beads followed by immunoblotting with  
112 anti-Flag antibody. (F) ASFV Flag-tagged-EP364R or C129R protein interaction with biotin-  
113 conjugated 2'3'cGAMP. 2  $\mu\text{g}$  of ASFV proteins were incubated with 10  $\mu\text{M}$  biotin 2'3'cGAMP or  
114 10  $\mu\text{M}$  biotin with reaction buffer for 2 h at 30<sup>0</sup>C with 1 mM IBMX and subjected to biotin  
115 pulldown by streptavidin magnetic beads followed by immunoblotting with anti-Flag antibody.  
116 All the luciferase data are representative of at least two independent experiments, each with similar  
117 results, and the values are expressed as mean  $\pm$  SD of two biological replicates. All the ELISA  
118 data are representative of at least two independent experiments, each with similar results, and the  
119 values are expressed as mean  $\pm$  SD of three biological replicates. All the immunoblot data are  
120 representative of at least two independent experiments, each with similar results. Student's t-test;  
121 \*  $p < 0.05$ ; \*\*  $p < 0.01$ ; \*\*\*  $p < 0.001$ .

122

123

124

125

126

127

128

129

FIG S7

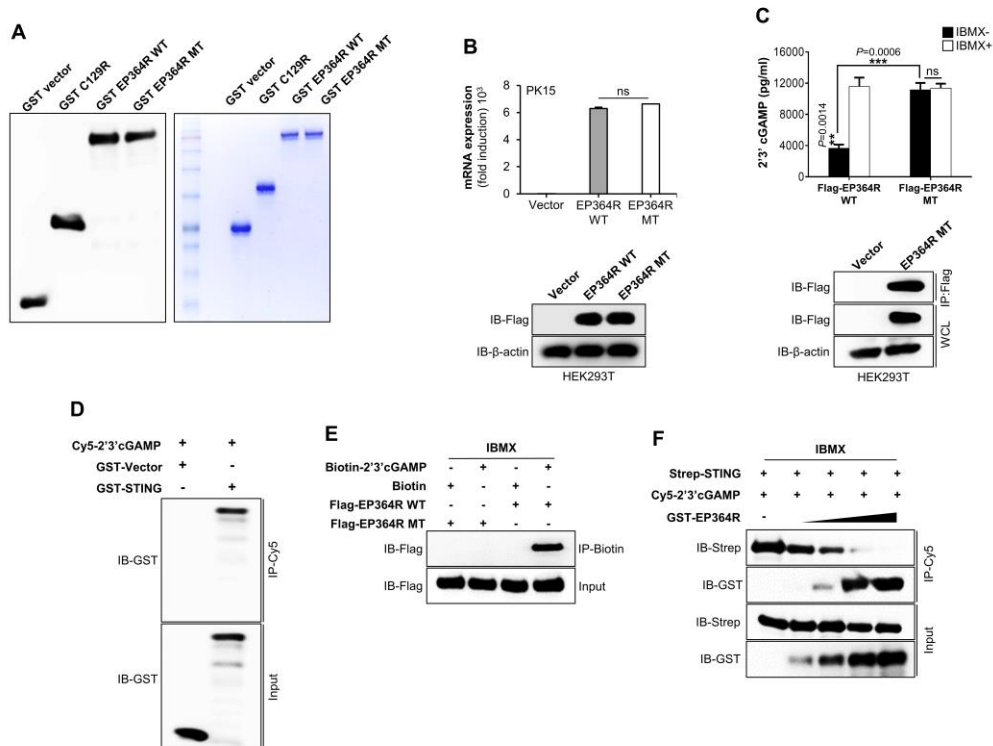

130

131 **FIG S7 GST protein purification and STING-cGAMP interaction competition**

132 (A) Purified GST protein was confirmed by western blot analysis and comassie staining of SDS-

133 PAGE. (B) Overexpression of Flag-EP364R-WT and Flag-EP364R-MT in PK-15 cells and

134 HEK293T cells. PK-15 cells were stably transfected with an Flag vector or Flag-EP364R-WT and

135 Flag-EP364R-MT and cDNA synthesized for qRT-PCR. Overexpression of Flag-EP364R-WT and

136 its mutant plasmid was confirmed by HEK293T cell stably transfected with an IRES-Flag vector

137 or Flag-EP364R-WT Flag-EP364R-MT immunoblotting with anti-Flag antibodies and β-Actin

138 was used to confirm equal loading of proteins. (C) *In vitro* 2'3'-cGAMP degradation assay. Flag-

139 EP364R-WT or its mutant EP364R-MT proteins plus 2.5 μM 2'3'-cGAMP with 1 mM IBMX were

140 incubated 22 h at 37<sup>0</sup>C in reaction buffer followed by 2'3'-cGAMP ELISA to quantify the remaining

141 2'3'cGAMP level in incubated samples. (D) *In vitro* STING – 2'3'cGAMP binding assay.  
142 Immunoprecipitated 2 µg of Strep-STING protein were incubated with 10 µM of Cy5 conjugated  
143 2'3'cGAMP with reaction buffer for 2 h at 30<sup>0</sup>C with 1 mM IBMX and subjected to Cy5 pulldown  
144 followed by immunoblotting with anti-GST antibody. (E) *In vitro* 2'3'cGAMP binding assay. Flag  
145 immunoprecipitated 2 µg of ASFV EP364R-WT or EP364R-MT proteins were incubated in 10  
146 µM 2'3'cGAMP-biotin or 10 µM biotin with reaction buffer for 2 h at 30<sup>0</sup>C with 1 mM IBMX  
147 followed by streptavidin pulldown (F) *In vitro* 2'3'cGAMP binding competition assay. The  
148 increasing amount of GST purified protein of EP364R-WT (0.25 µg, 0.5 µg, 1 µg, 2 µg) and GST  
149 vector protein as control (1.75 µg, 1.5 µg, and 1 µg) with a constant amount of Strep-STING  
150 protein (1 µg) incubated with 10 µM Cy5 conjugated 2'3'cGAMP in reaction buffer for 2 h at 30<sup>0</sup>C  
151 with 1 mM IBMX. Incubated protein mixture immunoprecipitated by anti Cy5 antibody followed  
152 by immunoblotting with anti-GST and anti-Strep antibodies. All the ELISA data are representative  
153 of at least two independent experiments, each with similar results, and the values are expressed as  
154 mean ± SD of three biological replicates. All the immunoblot data are representative of at least  
155 two independent experiments, each with similar results. Student's t-test; \* p < 0.05; \*\* p < 0.01;  
156 \*\*\* p < 0.001; ns, not significant.

157

158

159

160

161

162

163
